# Supplementary material for: Development and Validation of a Gene Profile Predicting Benefit of Postmastectomy Radiotherapy in Patients with High-Risk Breast Cancer: A Study of Gene Expression in the DBCG82bc Cohort
Source: Oxford University Press journal article supplement (doi:10.1158/1078-0432.ccr-14-0458), 2014-08-22
Supplement: 10780432ccr140458-sup-126704_1_supp_2506346_n6r76w.doc [file 10780432ccr140458-sup-126704_1_supp_2506346_n6r76w.doc]

**Supplementary Document 2**

**Transfer of DBCG-RT profile to RT-qPCR on formalin-fixed, paraffin-embedded material**

**Training set**

To transfer the DBCG-RT profile developed on fresh frozen tissue (FFT) samples to formalin-fixed, paraffin-embedded (FFPE) samples, paraffin blocks were identified from 158 patients in the 191 patient training set. The paraffin blocks were from the same primary tumours as the fresh frozen samples, but no information was available on the position or distance between the FFT and FFPE samples relative to each other. Four blocks had < 5% invasive carcinoma leaving 154 available for RT-qPCR (Supplementary Figure 1).

**Selection of genes**

TaqMan assays for RT-qPCR were available for 5 of the 7 interaction genes (*IGKC, RGS1, ADH1B* , *DNALI1, HLA-DQA*) and 4 reference genes (*ACTB, CALM2, RPLP0, RPL37A*) were selected based on previous results (1, Supplementary Table 1). All 4 reference genes and at least one interaction gene could be measured in 146 samples constituting the FFPE training set (Supplementary Figure 1). Table 1 list the number of samples with successful gene expression measurements as well as Pearson's correlation coefficient, *r*, for FFT/array *vs.* FFPE/RT-qPCR measurements. As *HLA-DQA* could only be detected in 10% of the samples and was not significantly associated with corresponding values measured in FFT samples, this gene was not included in the FFPE/RT-qPCR index.

**Table 1.** Samples with successful gene expression measurements and Pearson's correlation coefficient, *r*.

| *Gene* | *Successful gene expression measurements (FFPE)* | *FFT/array vs FFPE/RT-qPCR*  *Pearson's r (p value)* |
| --- | --- | --- |
| *IGKC* | 98% | 0.619 (1.9*10-16) |
| *RGS1* | 82% | 0.337 (1.7*10-4) |
| *ADH1B* | 40% | 0.266 (4.4*10-2) |
| *DNALI1* | 51% | 0.469 (2.5*10-5) |
| *HLA-DQA* | 10% | 0.440 (9.7*10-2) |

**FFPE/RT-qPCR index**

Gene expression values for the 4 interaction genes on FFPE samples were normalized to 4 internal reference genes and expressed as ΔCt values. Gene expression from array experiments were expressed as log2-transformed, quantile normalized values. Thus, although the expression levels measured on FFPE with RT-qPCR were significantly correlated with corresponding array measurements on FFT samples, the absolute expressions values were on a different scale. Table 2 list the mean expression values and standard deviations for FFT/array and FFPE/RT-qPCR measurements. Apart from *RGS1*, there was no significant difference in variance (F-test).

**Table 2.** Expression values FFT/array and FFPE/RT-qPCR measurements for 146 patients with corresponding samples.

| *Gene* | *FFT/array* | | *FFPE/RT-qPCR* | |
| --- | --- | --- | --- | --- |
| *Mean, μFFT* | *Std dev, σFFT* | *Mean, μFFPE* | *Std dev, σFFPE* |
| *IGKC* | -0.371 | 3.049 | -3.552 | 2.891 |
| *RGS1* | -4.042 | 1.624 | -3.894 | 2.444 |
| *ADH1B* | -2.706 | 3.217 | -7.854 | 3.403 |
| *DNALI1* | -1.399 | 2.063 | -8.050 | 2.387 |

In order to calculate the FFPE/RT-qPCR index, the absolute values were transformed by


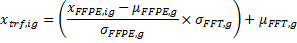


where
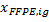
 and
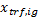
 are the expression values from FFPE before and after the transformation for
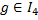
, the four interaction genes, for patient *i*.
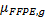
,
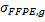
,
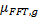
, and
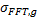
 are from Table 2.

As shown in Table 1, there are unsuccessful gene expression measurements for some of the genes for some of the samples. For *IGKC* only 2% are missing. For *RGS1*, *ADH1B*, and *DNALI1*, missing values were significantly correlated with higher Ct values of the 4 reference genes (T-test, p values 3.1*10-6, 4.1*10-4, 2.4*10-8, respectively), i.e. missing values were correlated with low yields of RNA caused by age of the paraffin block (1) and/or size of FFPE biopsy. Missing values are substituted with the
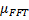
 values from Table 2.

The FFPE/RT-qPCR index is calculated by


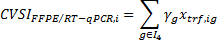


where the interaction coefficients, γ, for the 4 interaction genes, *I*, are from Supplementary Document 1, Table 1. The third quartile (see Supplementary Document 1) equals -1.1, and this value is used as the cut-point for the validation in the independent cohort.

**Comparing classification of patients**

Based on the original classification of the 191 patients (see Supplementary Document 1), 39 (27%) of the 146 patients were classified as "low LRR risk". Below are shown the correlations with classifications of the 146 patients based on the 4-gene FFPE/RT-qPCR index (Table 3) and a similar approach where the expression values for the 4 genes are taken from the array data (Table 4).

**Table 3.** Correlation between numbers of patients classified according to original CVSI index (7 genes) and FFPE/RT-qPCR index (4 genes). P value from chi squared test.

| p = 1.8*10-6 | | FFPE/RT-qPCR | |  |
| --- | --- | --- | --- | --- |
| Low LRR risk | High LRR risk | Total |
| Original | Low LRR risk | 21 | 18 | 39 |
| High LRR risk | 16 | 91 | 107 |
|  | Total | 37 | 109 | 146 |

**Table 4.** Correlation between numbers of patients classified according to original CVSI index (7 genes) with a similar approach as for the FFPE/RT-qPCR index above, but here the expression values for the 4 genes originates from array data. P value from chi squared test.

| p = 1.9*10-7 | | 4-gene / array | |  |
| --- | --- | --- | --- | --- |
| Low LRR risk | High LRR risk | Total |
| Original | Low LRR risk | 22 | 17 | 39 |
| High LRR risk | 15 | 91 | 107 |
|  | Total | 37 | 109 | 146 |

**Reference**

1. Tramm T, Sørensen BS, Overgaard J, and Alsner J. Optimal Reference Genes for Normalization of qRT-PCR Data from Archival Formalin-fixed, Paraffin-embedded Breast Tumors Controlling for Tumor Cell Content and Decay of mRNA. Diagn. Mol. Pathol 22 (3): 181-187, 2013.
